# Supplementary material for: Effects of Virtual Reality-Based Distraction of Pain, Fear, and Anxiety During Needle-Related Procedures in Children and Adolescents
Source: PubMed Central journal article supplement (PMC9063726; doi:10.3389/fpsyg.2022.842847), 2022-04-19
Supplement: Data_Sheet_2.pdf [file Data_Sheet_2.pdf]

---

**Supplementary Table S1.** ROB 2.0 criteria for RCTs

| Study                   | Bias arising from the randomization process | Bias due to deviations from intended interventions | Bias due to missing outcome data | Bias in measurement of the outcome | Bias in selection of the reported result | Overall bias |
|-------------------------|---------------------------------------------|----------------------------------------------------|----------------------------------|------------------------------------|------------------------------------------|--------------|
| Aydin 2019 (33)         | Unclear                                     | Low                                                | Low                              | Low                                | Low                                      | Low          |
| Chan 2019 (8)           | Low                                         | Low                                                | Low                              | Low                                | Low                                      | Low          |
| Chen 2020 (35)          | Low                                         | Low                                                | Low                              | Low                                | Low                                      | Low          |
| Gerçeker 2021 (19)      | Unclear                                     | Unclear                                            | Low                              | Low                                | Low                                      | Unclear      |
| Gold 2006 (36)          | Unclear                                     | Unclear                                            | Low                              | Low                                | Low                                      | Unclear      |
| Gold 2018 (17)          | Unclear                                     | Low                                                | Low                              | Low                                | Low                                      | Low          |
| İnangil 2020 (34)       | Low                                         | Unclear                                            | Low                              | Low                                | Low                                      | Low          |
| Koç Özkan 2020 (7)      | Low                                         | Unclear                                            | Low                              | Low                                | Low                                      | Low          |
| Özalp Gerçeker 2020 (9) | Low                                         | Unclear                                            | Low                              | Low                                | Low                                      | Low          |
| Semerci 2021 (21)       | Low                                         | Unclear                                            | Low                              | Low                                | Low                                      | Low          |

---
